# Supplementary material for: Observed multi-decadal trends in subsurface temperature adjacent to the East Australian Current
Source: Copernicus journal article supplement (doi:10.5194/egusphere-2022-1336), 2022-12-13
Supplement: Supplementary file [file egusphere-2022-1336-AC2-supplement.pdf]

## Anonymous Referee #2

We thank the anonymous referee for reviewing our work.

### Major

The inference that warming is accelerating seems to be (?) based on the magnitude of decadal trends, given in Figure 4, getting larger when computed for more recent decades. However, I struggle to see what statistical evidence there is for acceleration, since you've not explicitly tested for a change in the rate of warming.

The acceleration we identify is based on both the magnitude of the decadal trends in Figure 4, as well as the trends shown in Figure 3. We acknowledge that the trend uncertainty reduces the robustness of the accelerating trends.

We suspected that the higher uncertainty close to the start and end of the time series is dominated by the EEMD methodology. We explored this through estimating the trend using the piecewise linear fit method with 4 x 15-year segments, following the recommendations suggested by Cheng et al. (2022).

The trends and uncertainties using the EEMD and piecewise linear fit methods are compared with one another below in Figure 1. As per our paper, we use the deseasonalised temperatures to estimate the piecewise linear fit trend, and the downsampling method to estimate uncertainty. The comparison in Figure 1 highlights that the higher uncertainty arises from the method rather than from the *in situ* temperature timeseries. Indeed, we see that the trend is also accelerating using the piecewise linear fit method and the EEMD trend is within the uncertainty bounds of the piecewise linear fit trend. Hence, even when keeping in mind the uncertainty, particularly close to the start and end of the timeseries, we are confident that temperatures are accelerating.

The piecewise linear fit uncertainty is higher close to the segment break points, hence, like the EEMD method, the piecewise linear fit method is also sensitive to boundaries.

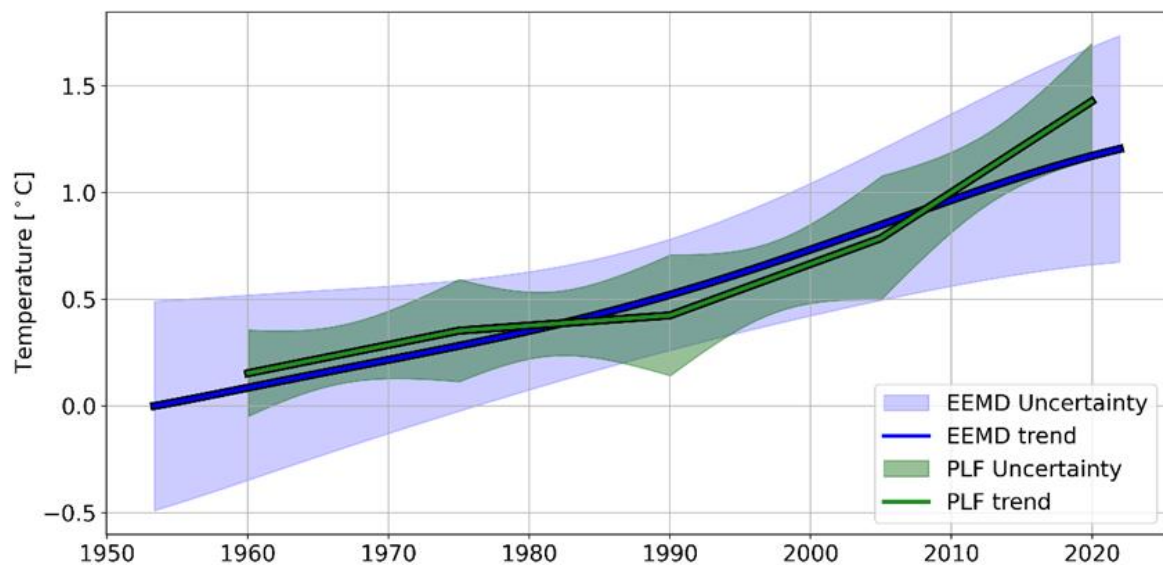

**Figure 1:** The Ensemble Empirical Mode Decomposition (EEMD) and Piecewise Linear Fit (PLF) trends and their uncertainty at 2m depth at the Port Hacking site. For visualisation purposes, an offset of approximately 0.2°C has been added to the piecewise linear fit trend so to not start at zero in 1960. This offset was calculated using the mean difference between the EEMD and piecewise linear fit trends between 1960 and 2020 prior to applying the offset.

We now include Figure 1 above in the appendix, along with a new appendix section called 'Acceleration Uncertainty'. Here we describe the piecewise linear fit methodology as follows:

*Our results show that the temperature trend is accelerating at Port Hacking and Maria Island when estimated using the EEMD method, albeit with some uncertainty (Fig. 4,  $\pm 0.07 - 0.14^{\circ}\text{C}$*

decade). We gain insight into uncertainty that is related to the EEMD methodology rather than from the temperature time series itself by comparing the EEMD trend with one estimated using a piecewise linear fit. Here we show the 2 m depth trend at Port Hacking following the methodology for ocean heat content described by Cheng et al., (2022). Piecewise linear fit segments of 15 years were determined as optimal for deriving a non-linear trend (Cheng et al., 2022), therefore we used 4 x 15-year segments here: 1960-1975, 1975-1990, 1990-2005, and 2005-2020. As with the TSSE trend at this depth, deseasonalised temperatures were used to estimate the piecewise linear fit trend. The downsampling method that was used for estimating uncertainty for the EEMD trends was also used to estimate the piecewise linear fit trend uncertainty.

We have edited text, and added a new paragraph relating to the EEMD uncertainty in Section 4.2 as follows:

*The EEMD method is useful as it shows rates of warming over time, but the uncertainty associated with the EEMD trends has to be considered. We suspect that a large portion of the higher uncertainty that we estimate close to the time series start and end points (Fig 3) is due to the methodology, rather than due to the temperature time series. This is because the EEMD method suffers from edge effects (Stallone et al., 2020). We explored the extension algorithm provided by Stallone et al., (2020) for reducing edge effects, but sensitivity tests indicated that in our case it was better to use the original non-extended time series.*

*To test whether the estimated EEMD uncertainty was predominantly a result of the methodology, we compared the EEMD trend and its uncertainty with a Piecewise Linear Fit trend and its uncertainty (Figure A3), following the methodology described in Appendix C. The piecewise linear fit results also confirms that the warming trend is accelerating over time and has lower uncertainty than the EEMD trend uncertainty. Further, the EEMD trend is within the uncertainty range of the piecewise linear fit trend. This comparison suggests that, despite the higher uncertainty, the EEMD method is useful for identifying a meaningful accelerating trend.*

At the very least, uncertainties are needed on the EEMD decadal trends shown in Figure 4, ...

We have added the uncertainties to Figure 4, and the revised figure is below. These uncertainties were calculated as follows (and added to Appendix B):

*For the decadal trend estimates (°C decade, Figure 4), we provide uncertainties that are calculated by taking the standard deviation of the 1,000 subsampled mean rates; that being the means of the first order temporal derivative of each trend estimate for each decade multiplied by 10.*

The uncertainty shown in Figure 3 represents variability in the trend start/end points (offset), while the uncertainty shown in Figure 4 represents variability in the slope of the trend.

We now include this updated figure in the edited version of the manuscript, along with an updated caption (also copied below).

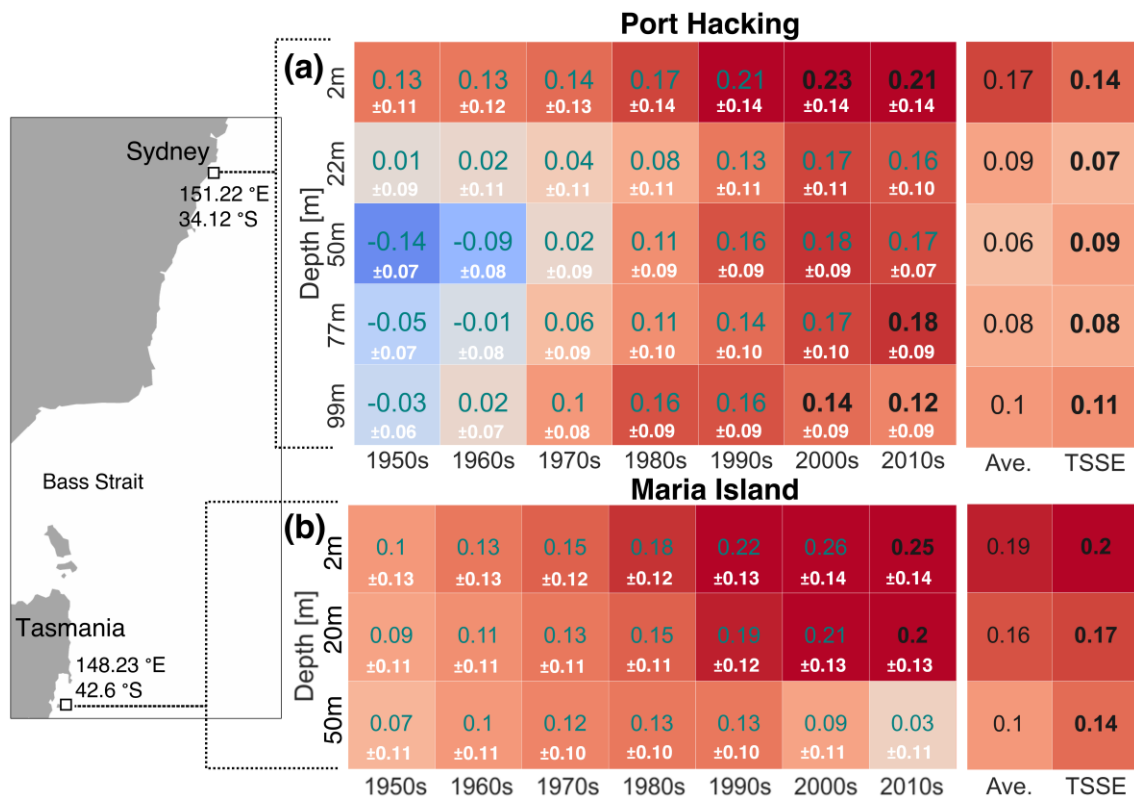

**Revised Figure 4:** Temperature trends for multiple depths at (a) Port Hacking (NRSPHB) and (b) Maria Island (NRSMAL). Statistically significant (black bold text) and statistically insignificant (grey text) average EEMD trend rates per decade ( $^{\circ}\text{C}$  decade), and the total time-average over all decades ('Ave.', black text) are shown. The uncertainty for each decade is listed beneath the average EEMD trend rates as white text. The statistically significant Theil-Sen Slope Estimator (TSSE) trend estimates ( $^{\circ}\text{C}$  decade) using data over the whole time period are also shown for each site. The locations of the sites are shown in the left panel. The total time-averaged EEMD estimates use both statistically significant and insignificant trend rates over the whole time period, and thus are taken as insignificant estimates. Decade trends are considered significant if 75% or more of the trend during the selected decade are outside the 95% confidence bounds.

(continued) ... and some evaluation of these is needed so that the reader can understand whether the trend magnitude during one period (e.g. 2010s) is statistically distinguishable from that during another (e.g. 1950s). After all, you go on to state that there is "high uncertainty" that the warming rate at 2 m at Port Hacking and Maria Island has accelerated over time (L215), but it's not particularly clear to the reader how large these uncertainties are, or how you've reached that conclusion. I note that an uncertainty as large as  $0.5^{\circ}\text{C decade}^{-1}$  is given later (L263) for the EEMD trends.

Where applicable we edited the text so that the uncertainties are listed rather than simply stating "high uncertainty", as we agree with the reviewer that this wasn't clear. For example:

L240 (updated manuscript) *The Port Hacking and Maria Island EEMD warming rates at 2 m depth have accelerated over time ( $0.2$  to  $0.25^{\circ}\text{C decade}^{-1}$  during the 2010s), with uncertainty of  $\pm 0.11$  to  $\pm 0.14^{\circ}\text{C decade}^{-1}$  (Fig. 4).*

*We have also edited text elsewhere relating to the EEMD trend uncertainties. These changes are visible in the tracked changes version of the manuscript.*

We discussed the EEMD trend uncertainty in the results section on L171:

*The uncertainty is approximately  $0.5^{\circ}\text{C decade}$  close to the time period edges (1953 and 2022), and approximately  $0.25^{\circ}\text{C decade}$  between the 1980s and 2000s.*

But we acknowledge that this paragraph is short, so we have edited it as follows:

*The uncertainty for EEMD trends at both Port Hacking and Maria Island at any given time is shown in Fig. 4. The uncertainty at the surface is approximately  $0.5^{\circ}\text{C}$  close to the time*

period edges (1953 and 2022), and approximately  $0.3^{\circ}\text{C}$  between the 1980s and 2000s. When considering the whole time series, the uncertainty for the decadal trends is shown in Fig. 4, and is approximately  $\pm 0.07$  to  $0.14^{\circ}\text{C decade}^{-1}$ . In general, uncertainty below the surface is lower than at the surface, and uncertainty decreases with depth, with the most robust results at the bottom. We tested the uncertainty estimates (as discussed and shown in Appendix C and Fig. A3, respectively) and we are confident that the accelerating rates of warming presented are robust.

Can acceleration of warming between decades actually be distinguished from these in-situ T timeseries, given such large uncertainties in the warming trends themselves?

As described above, we acknowledge that the trend uncertainty reduces the robustness of the accelerating trends. Figure 1 above highlights that the higher uncertainty close to the time series start and end points arises from the method rather than from the *in situ* temperature timeseries.

We also see that the piecewise linear fit trend is also accelerating and that the EEMD trend is within the uncertainty bounds of the piecewise linear fit trend. Hence, even when keeping in mind the uncertainty, we are confident that temperatures are accelerating.

### Minor

2. L145-147. I think (?) you mean that the decadal trend is estimated by taking "...the mean of the first order temporal monthly derivative of the EEMD  $R(t)$  for each decade...", rather than "...the mean of the first order temporal monthly derivative of the EEMD temperature trend for each decade..."

We have modified the text as follows:

"...the mean of the first order temporal monthly derivative of the EEMD temperature trend ( $R(t)$ ) for each decade..."

' $R(t)$ ' is mentioned in Appendix B only, hence for clarity we will only include this in brackets here.

3. L152. It's really hard to see the white dashed lines in Figure 3.

We have improved the figure (also copied below with edited caption) so that significant trend periods have a filled colour with a thick black outline and insignificant periods have instead a dashed line. We think the significant/insignificant periods are now easier to distinguish.

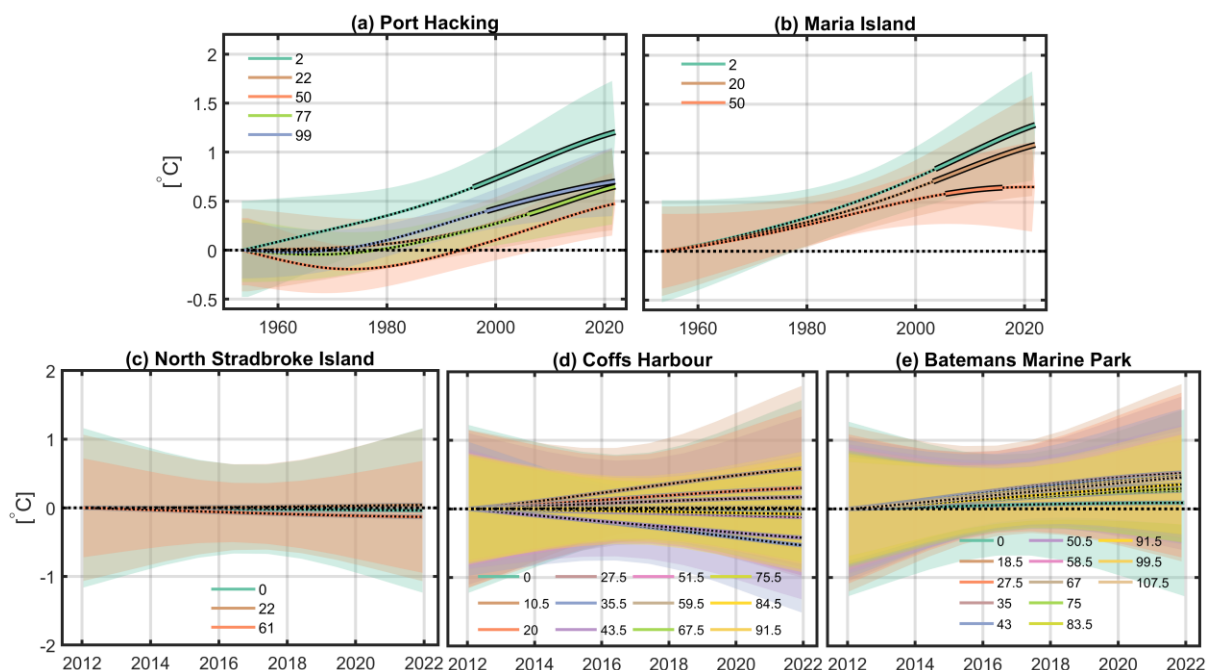

**Revised Figure 3:** The temperature Ensemble Empirical Mode Decomposition (EEMD) trends at each of the five sites: (a) Port Hacking, (b) Maria Island, (c) North Stradbroke Island, (d) Coffs Harbour, and (e) Batemans Marine Park. Each colored line represents a depth level (metres) at each of the sites, as indicated in the corresponding legends. The uncertainty for each depth level estimated using the downsampling method is represented by the shaded area with the colour corresponding to the lines. Significant trend periods are represented by a filled line with a black outline. Insignificant trend periods are indicated by dashed lines. Note the difference in y- and x-axis limits between panels (a-b) and (c-e).

4. L160-161. Can you please clarify how you are “detecting” acceleration here? Presumably based on the trend magnitude increasing between decades? This sentence also implies that the acceleration is not statistically significant until the 1990s, but it’s unclear in the manuscript what method you are using to assess this?

We have edited this sentence as follows:

*At most depths EEMD trend acceleration is detected from the 1970s, although not statistically significant until the 1990s as determined by the methodology described in Appendix B.*

5. L247. I’m not sure that Shears and Bowen (2017) “emphasize acceleration”. The decadal trends at Maria Island they present during 1982-2016 are larger than between 1946-2016, but the uncertainties on these trends are large and they overlap with one another. Therefore, it’s questionable whether any acceleration is present and/or statistically supported.

We have edited this sentence as follows:

*Shears and Bowen (2017) also present possible acceleration at Maria Island providing temperature trends of  $0.2\text{ }^{\circ}\text{C decade}^{-1}$  from 1946 to 2016, and  $0.32\text{ }^{\circ}\text{C decade}^{-1}$  from 1982 to 2016, respectively, keeping in mind that these trends likely have considerable uncertainty and overlap with one another.*

6. L355-364. Based on the text in Appendix B, I was confused as to how you extract a final value (e.g.  $^{\circ}\text{C decade}^{-1}$ ) for the “monotonic trend” of  $x(t)$  using EEMD. I think this information is given in the main text on L145-147: it is the mean of the first order temporal monthly derivative of  $R(t)$ . Please clarify how you end up with trends in  $^{\circ}\text{C decade}^{-1}$  in Appendix B.

We have included the following text on how we extract decadal trends in Appendix B (L384):

*To highlight how the temperature trends have evolved over time at the long-term sites, and to allow temporal contextualisation for other shorter studies, we show the EEMD trends for each decade on record. We take the mean of the first order temporal monthly derivative of  $R(t)$  for each decade multiplied by 120 to reveal the mean decadal trends.*
